# Supplementary material for: A multiplex and fast detection platform for microRNAs based on a self-priming microfluidic chip and duplex-specific nuclease
Source: Royal Society of Chemistry journal article supplement (doi:10.1039/d0an01691h), 2020-11-04
Supplement: d0an01691h1.pdf [file d0an01691h1.pdf]

**Supplementary Information**

**A multiplex and fast detection platform for  
microRNA based on self-priming microfluidic  
chip and duplex specific nuclease**

Zheyu Zou<sup>ab</sup>, Yuanhui Liu<sup>ab</sup>, Liping Xia<sup>ab</sup>, Zhenming Hu<sup>a</sup>, Juxin Yin<sup>a✉</sup>, Ying Mu<sup>a✉</sup>

a. Research Centre for Analytical Instrumentation, Institute of Cyber-Systems and Control, State Key

Laboratory of Industrial Control Technology, Zhejiang University, Hangzhou, 310023, P. R. China

b. College of Life Sciences, Zhejiang University, Hangzhou, 310058, P. R. China

✉Corresponding author: muying@zju.edu.cn; yinjuxin@163.com

The specificity of the assay between single-base and double-bases mismatch

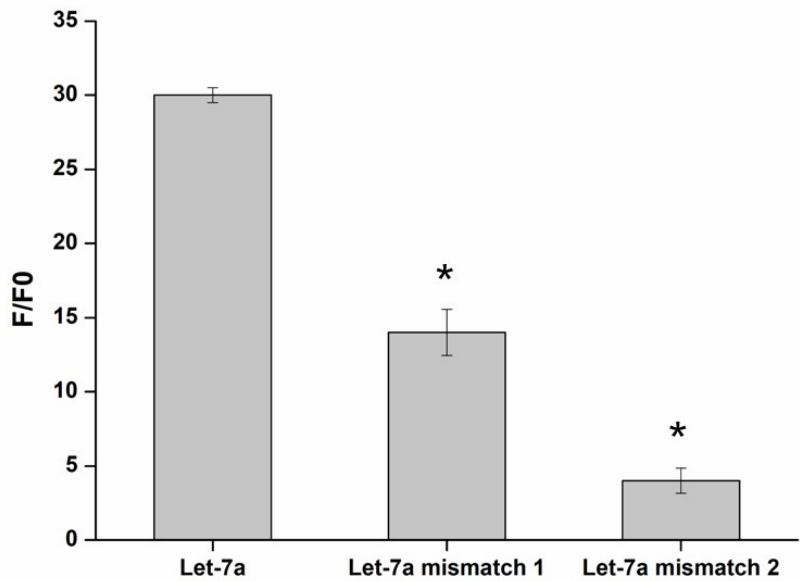

**Figure S1 Discrimination power between perfectly matched and mismatched targets.**

The probe used in three experiments was Probe Let-7a, and the concentration was 100 nM. The concentration of each template was 10 nM. The error bars are the standard deviations for three replicates. \*p < 0.05 vs. Let-7a

**Table S1 Sequences of perfectly matched and mismatched templates**

| Name              | Sequence 5` - 3`                                 |
|-------------------|--------------------------------------------------|
| Let-7a            | UGAGGUAGUAGGUUGUAUAGUU                           |
| Let-7a mismatch 1 | UGAGGU <sup>C</sup> GUAGGUUGUAUAGUU              |
| Let-7a mismatch 2 | UGAGGU <sup>C</sup> GUAGGU <sup>G</sup> GUAUAGUU |
| Probe Let-7a      | FAM-AACTATACAACCTACTACCTCA-BHQ                   |

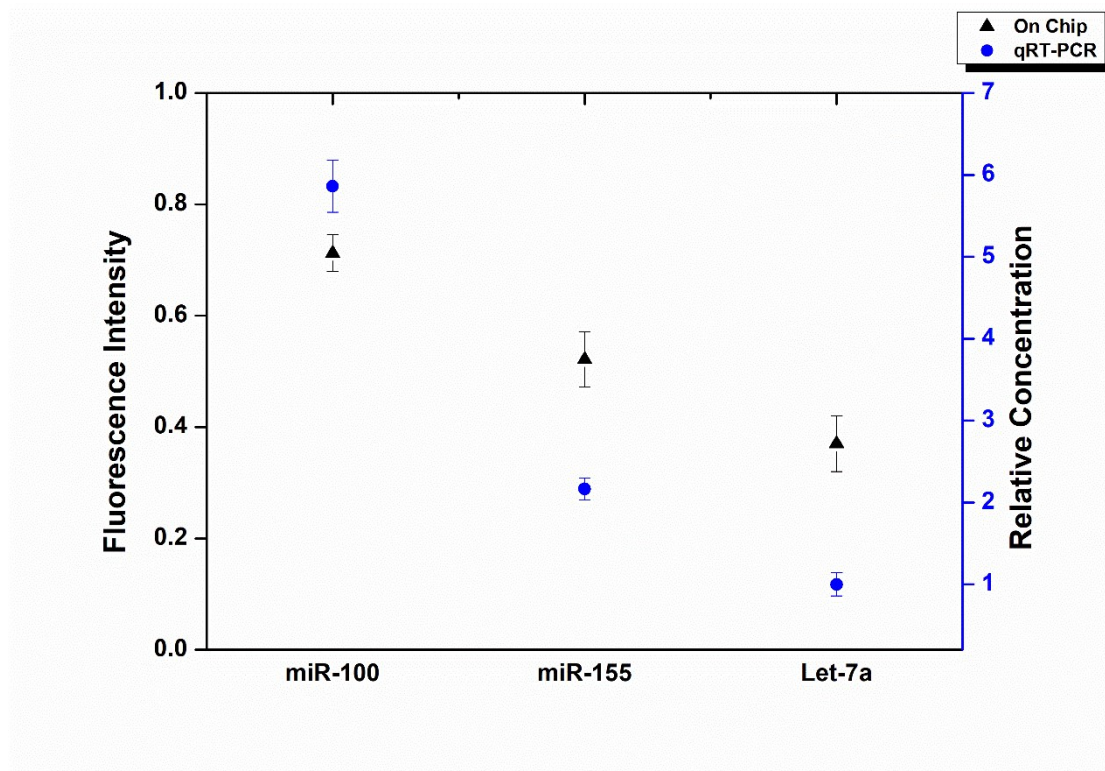

**Figure S2 Quantification of different microRNA in MDA-MB-468 using different methods.**

The figure showed the concentrations of three kinds of microRNA in MDA-MB-468 tested by our chip (Black triangle ▲) and qRT-PCR(Blue circle ●). The fluorescence intensity was obtained by imaging. The relative concentration was converted from  $\Delta C_t$ . The error bars are the standard deviations for three replicates.

**Table S2 Primers designed for qRT-PCR**

|                                |                                                               |
|--------------------------------|---------------------------------------------------------------|
| miR-100<br>stem-loop RT primer | CCTGTTGTCTCCAGCCACAAAAGAGCACAATATTTTCAGGA<br>GACAACAGGCACAAGT |
| miR-100<br>forward primer      | CGGGCAACCCGTAGATCCGA                                          |
| miR-100<br>reverse primer      | CAGCCACAAAAGAGCACAAT                                          |
| miR-155<br>stem-loop RT primer | CCTGTTGTCTCCAGCCACAAAAGAGCACAATATTTTCAGGA<br>GACAACAGGCCCTAT  |
| miR-155<br>forward primer      | CGGGCTTAATGCTAATCGTG                                          |
| miR-155<br>reverse primer      | CAGCCACAAAAGAGCACAAT                                          |
| Let-7a<br>stem-loop RT primer  | CCTGTTGTCTCCAGCCACAAAAGAGCACAATATTTTCAGGA<br>GACAACAGGAACTATA |
| Let-7a<br>forward primer       | CGGGCTGAGGTAGTAGGTTG                                          |
| Let-7a<br>reverse primer       | CAGCCACAAAAGAGCACAAT                                          |
